# Supplementary material for: Combined genomic evaluation of Australian Merino and Dohne Merino sheep populations
Source: Springer Nature journal article supplement (doi:10.1186/s12711-024-00934-2), 2023-01-01

Split of population according to PCA coordinates

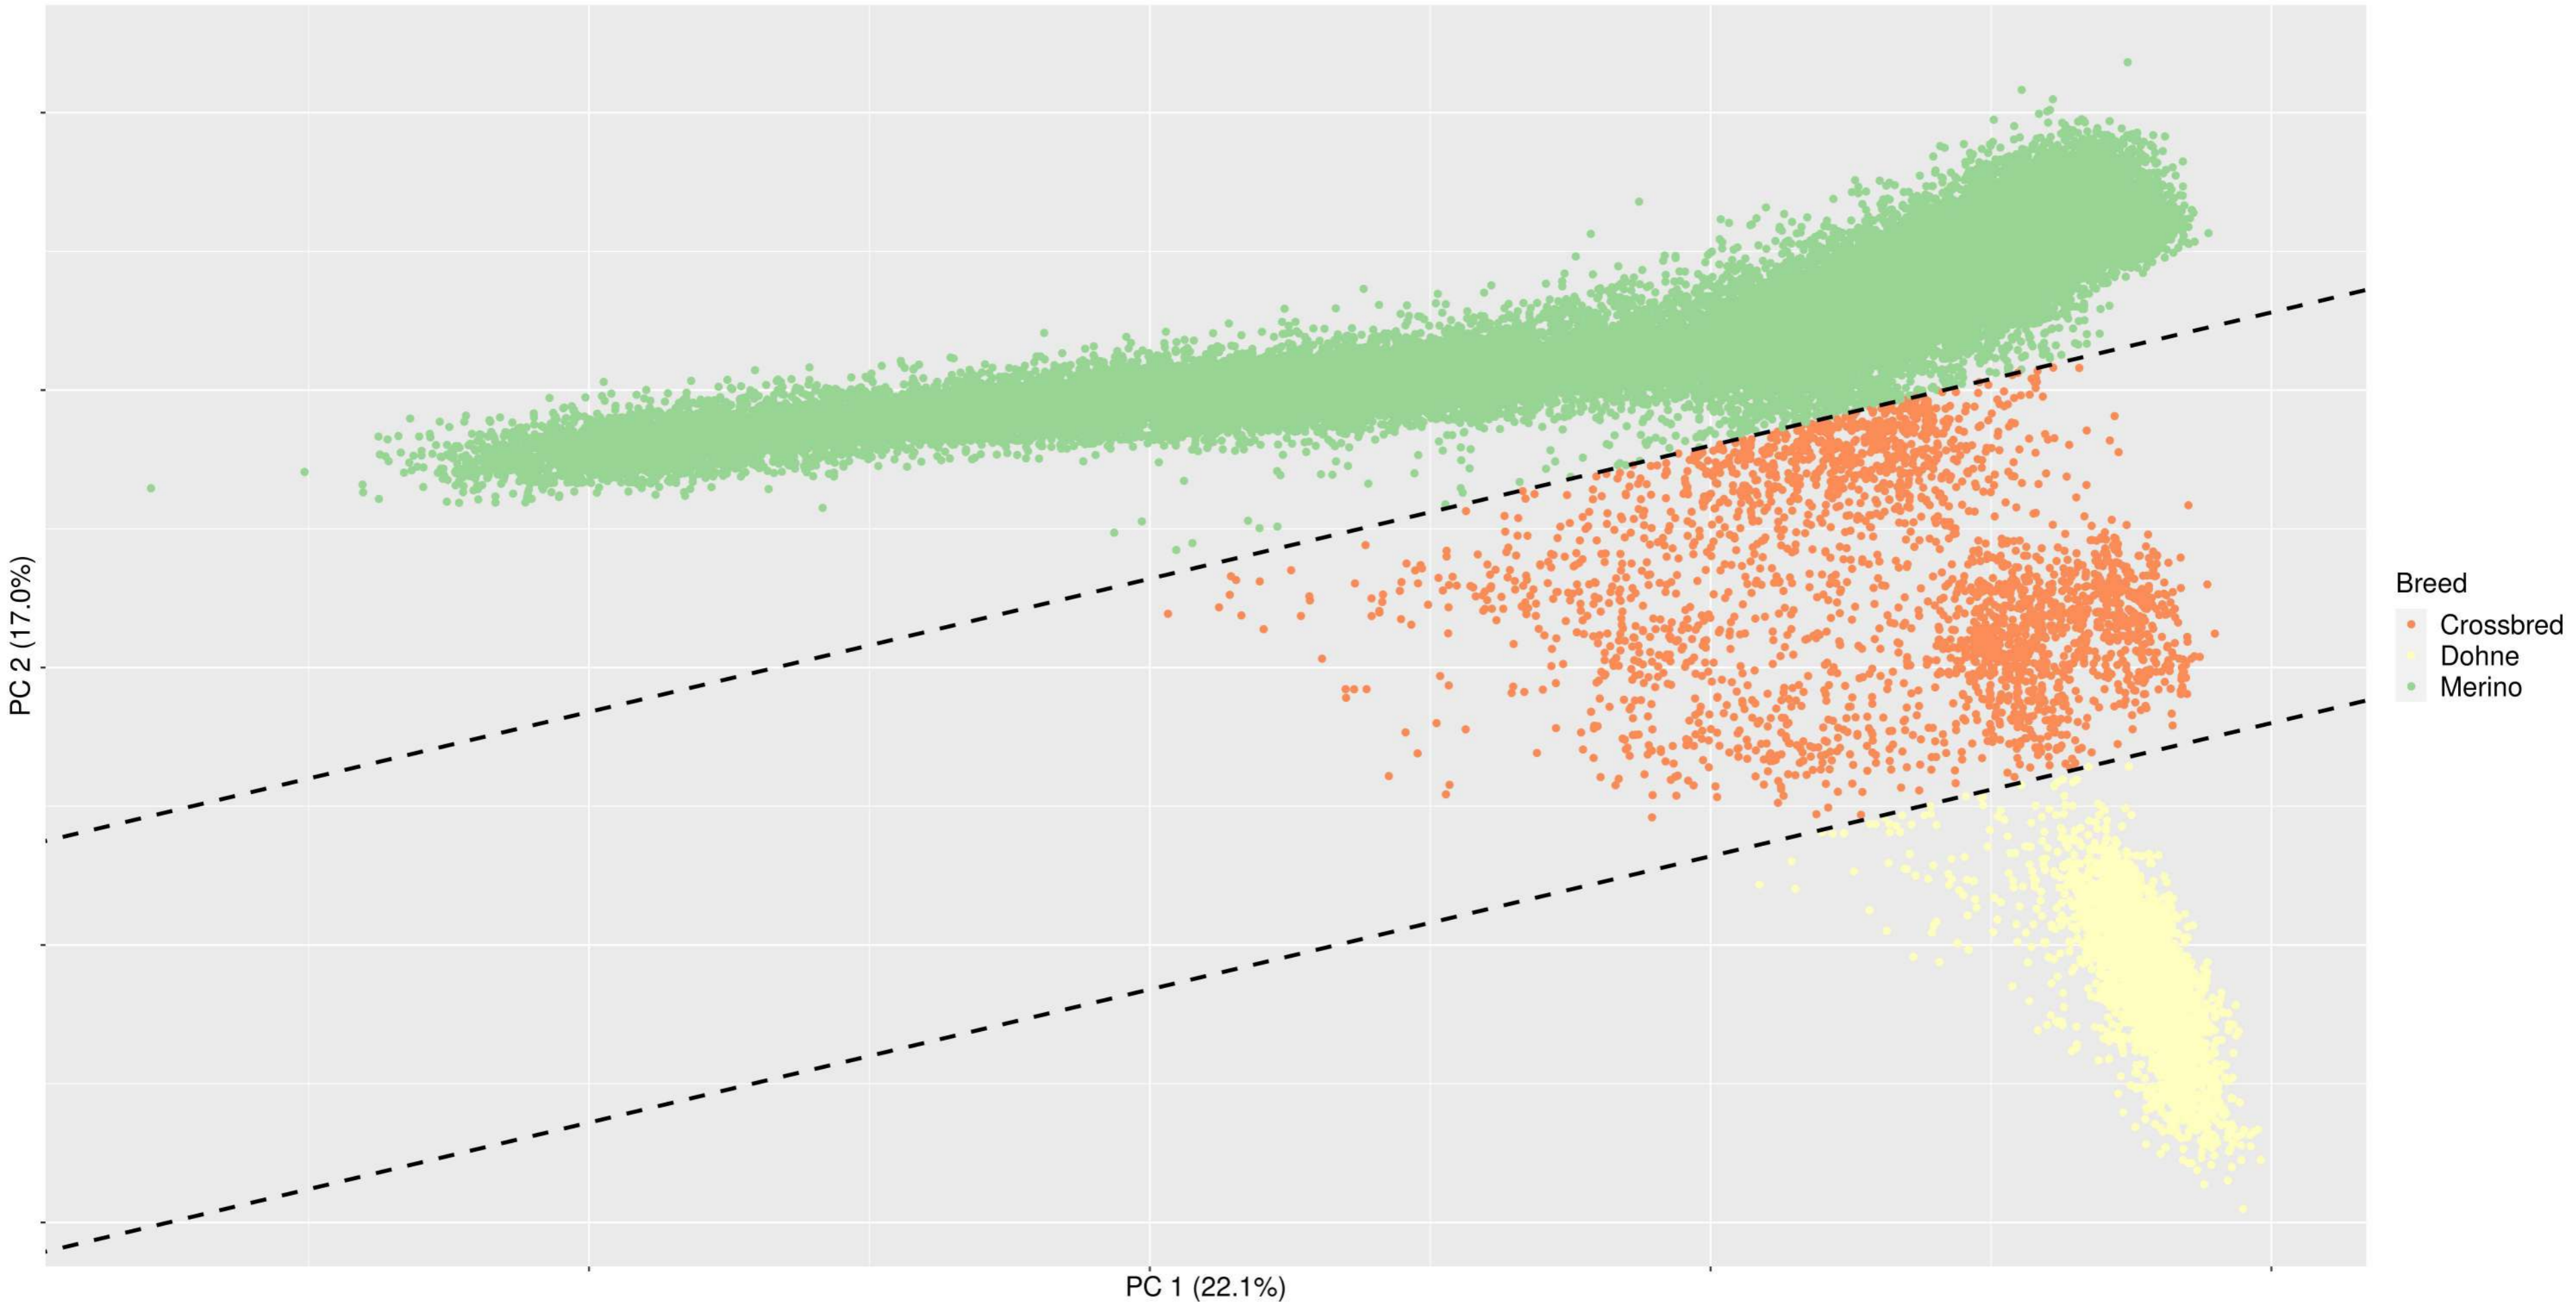

Supplement: MOESM1 [file 12711_2024_934_MOESM1_ESM.pdf]
